# Supplementary material for: Carborane functionalized pyrroles and porphyrins via the Suzuki cross-coupling reaction
Source: Royal Society of Chemistry journal article supplement (doi:10.1039/b611571c), 2006-01-01
Supplement: b611571c.pdf [file b611571c.pdf]

## Supporting Information

# Carborane functionalized pyrroles and porphyrins via the Suzuki cross-coupling reaction

Erhong Hao, Frank R. Fronczek, M. Graça H. Vicente\*

*Department of Chemistry, Louisiana State University, Baton Rouge, LA 70803, USA. Fax: 225-578-3458; Tel: 225-578-7405; E-mail: vicente@lsu.edu*

### Instrumentation and Materials

All reactions were monitored by TLC using 0.25 mm silica gel plates with or without UV indicator (60F-254). Silica gel Sorbent Technologies 32-63  $\mu\text{m}$  was used for flash column chromatography.  $^1\text{H}$ - and  $^{13}\text{C}$ -NMR were obtained on either a DPX-250 or an ARX-300 Bruker spectrometer. Chemical shifts ( $\delta$ ) are given in ppm relative to  $\text{CDCl}_3$  (7.26 ppm,  $^1\text{H}$ ) or  $\text{CD}_2\text{Cl}_2$  (5.32 ppm,  $^1\text{H}$ ), unless otherwise indicated. Electronic absorption spectra were measured on a Perkin Elmer Lambda 35 UV-Vis spectrophotometer. MALDI-TOF mass spectra were obtained on an Applied Biosystems QSTAR XL, using positive method with dithranol as matrix unless otherwise indicated. Exact mass was obtained from ESI-TOF under negative or positive mode. The isotope peaks were matched with calculated patterns. Only the most abundant peaks are listed below (see the copy of spectra for isotope peaks). Unless otherwise noted, materials obtained from commercial suppliers were used without further purification.

**General coupling procedure (9 as an example):** A 50 mL shlenk reaction tube was charged with H<sub>2</sub>TPPBr<sub>4</sub> (18.6 mg, 1 eq), Pd(PPh<sub>3</sub>)<sub>4</sub> (4.6 mg, 0.2 eq), boronic acid **8** (58.4 mg, 10 eq), and anhydrous K<sub>2</sub>CO<sub>3</sub> (55.2 mg, 20 eq). Anhydrous toluene (10 mL) was added via syringe. The mixture was degassed using the freeze-pump-thaw method three consecutive times. The reaction was then heated to 90 °C for three days. The resulting mixture was purified by silica gel flash chromatography using CHCl<sub>3</sub> for elution.

**Characterization data for new compounds:**

**Compound 2:** <sup>1</sup>H-NMR (300 MHz, CDCl<sub>3</sub>) δ 7.85 (2H, d, J = 7.76 Hz), 7.23 (2H, d, J = 7.81 Hz), 3.49 (2H, s), 2.19 (3H, s), 1.5-3.5 (10H, br), 1.41 (12H, s). <sup>13</sup>C-NMR (75 MHz, CDCl<sub>3</sub>) δ 139.5, 136.6, 131.3, 85.6, 79.0, 78.3, 42.9, 26.5, 25.3. HRMS (ESI) [M-C<sub>2</sub>H(CH<sub>3</sub>)<sub>4</sub>]<sup>+</sup>: 291.2535, calcd. for C<sub>10</sub>H<sub>20</sub>B<sub>11</sub>O<sub>2</sub>: 291.2565.

**Compound 3:** <sup>1</sup>H-NMR (300 MHz, CDCl<sub>3</sub>) δ 7.50 (2H, d, J = 8.19 Hz), 7.13 (2H, d, J = 8.31), 7.10 (1H, m), 6.82 (1H, m), 6.61 (1H, m), 3.45 (2H, s), 2.16 (3H, s), 1.5-3.5 (10H, br), 1.41 (3H, s), 1.11 (18H, m). MALDI-TOF [M+H]<sup>+</sup>: 470.745, calcd. for C<sub>23</sub>H<sub>44</sub>B<sub>10</sub>NSi: 470.782. HRMS (ESI) [M + Na]<sup>+</sup>: 492.4086, calcd. for C<sub>23</sub>H<sub>43</sub>B<sub>10</sub>NSiNa: 492.4078.

**Compound 4:** <sup>1</sup>H-NMR (250 MHz, CD<sub>2</sub>Cl<sub>2</sub>) δ 8.43 (1H, br), 7.53 (2H, d, J = 8.19 Hz), 7.15 (2H, d, J = 8.31), 7.14 (1H, m), 6.84 (1H, m), 6.53 (1H, m), 3.48 (2H, s), 2.18 (3H, s), 1.5-3.5 (10H, br), <sup>13</sup>C-NMR (75 MHz, CD<sub>2</sub>Cl<sub>2</sub>) δ 136.1, 132.5, 131.0, 125.4, 124.4, 119.4, 115.2, 106.6, 78.8, 75.7, 41.2, 23.9. MALDI-TOF [M+H]<sup>+</sup>: 314.367, calcd. for C<sub>14</sub>H<sub>24</sub>B<sub>10</sub>N: 314.442. HRMS (ESI) [M-H]<sup>-</sup>: 312.2721, Calcd. for C<sub>14</sub>H<sub>22</sub>B<sub>10</sub>N: 312.2721.

**Compound 6:** <sup>1</sup>H-NMR (250 MHz, CDCl<sub>3</sub>) δ 7.67 (2H, d, J = 8.09 Hz), 6.92 (2H, d, J = 8.07 Hz), 3.39 (2H, s), 2.15 (3H, s), 1.5-3.5 (10H, br). <sup>13</sup>C-NMR (75 MHz, CDCl<sub>3</sub>) δ

138.2, 134.9, 132.6, 94.3, 76.8, 74.8, 41.1, 24.1. HRMS (ESI)  $[M-H]^-$ : 373.1487, calcd. for  $C_{10}H_8B_{10}I$ : 373.1462.

**Compound 8:**  $^1H$ -NMR (300 MHz, DMSO- $d_6$ )  $\delta$  8.06 (2H, s), 7.74 (2H, d,  $J = 7.75$ ), 7.21 (2H, d,  $J = 7.86$ ), 3.32 (2H, s), 2.21 (3H, s), 1.5-3.5 (10H, br).  $^{13}C$ -NMR (75 MHz, DMSO- $d_6$ )  $\delta$  137.2, 134.1, 129.5, 78.9, 76.4, 75.2, 40.5, 22.9. HRMS (ESI)  $[M-H]^-$ : 291.2566, calcd. for  $C_{10}H_{20}B_{11}O_2$ : 291.2565.

**Compound 9:**  $^1H$ -NMR (250 MHz,  $CD_2Cl_2$  with 0.1 % TFA)  $\delta$  8.30 (8H, br), 8.24 (4H, s), 7.67-7.70 (12H, m), 6.71-6.74 (16H, m), 3.20-3.22 (8H, m), 2.05 (12H, s), 1.5-3.5 (40H, br). MS (MALDI-TOF)  $[M]^+$ : 1600.24 calcd. for  $C_{84}H_{102}B_{40}N_4$ : 1600.18. HRMS (ESI)  $[M + H]^+$ : 1601.2177, calcd. for  $C_{84}H_{103}B_{40}N_4$ : 1601.2214. UV-vis ( $CH_2Cl_2$  with 1%  $NEt_3$ )  $\lambda_{max}$  (nm): 433 (log  $\epsilon$  5.41), 527 (4.25), 600 (3.79), 670 (3.54).

**Compound 10:**  $^1H$ -NMR (250 MHz,  $CD_2Cl_2$ )  $\delta$  8.69-8.72 (2H, m), 8.56-8.58 (2H, m), 8.47-8.49 (1H, m), 8.25-8.29 (2H, m), 7.68-7.80 (8H, m), 7.23-7.39 (12H, m), 6.96-6.99 (2H, d,  $J = 8.21$ ), 6.87-6.91 (4H, m), 6.66-6.69 (4H, d,  $J = 7.03$ ), 3.39 (2H, s), 3.17 (4H, s), 2.21 (3H, s), 2.14 (6H, s), 1.5-3.5 (30H, br), -2.38 (2H, br). MS (MALDI-TOF)  $[M]^+$ : 1353.62, calcd. for  $C_{74}H_{84}B_{30}N_4$ : 1353.82. HRMS (ESI)  $[M + H]^+$ : 1354.9814, calcd. for  $C_{74}H_{85}B_{30}N_4$ : 1354.9795. UV-vis ( $CH_2Cl_2$  with 1%  $NEt_3$ )  $\lambda_{max}$  (nm): 431 (log  $\epsilon$  5.51), 526 (4.41), 555 (sh, 4.18), 597 (4.05), 657 (3.72).

**Compound 11:**  $^1H$ -NMR (250 MHz,  $CD_2Cl_2$ )  $\delta$  7.76 (8H, m), 7.24-7.32 (12H, m), 6.55-6.84 (32H, m), 3.18-3.34 (16H, m), 2.11-2.21 (24H, m), 1.5-3.5 (80H, br). MS (MALDI-TOF)  $[M+H]^+$ : 2643.807, calcd. for  $C_{124}H_{173}B_{80}N_4Ni$ : 2643.174. UV-vis ( $CH_2Cl_2$ )  $\lambda_{max}$  (nm): 441 (log  $\epsilon$  5.11), 556 (4.04), 597 (3.93).

Mass spectra for all new compounds:

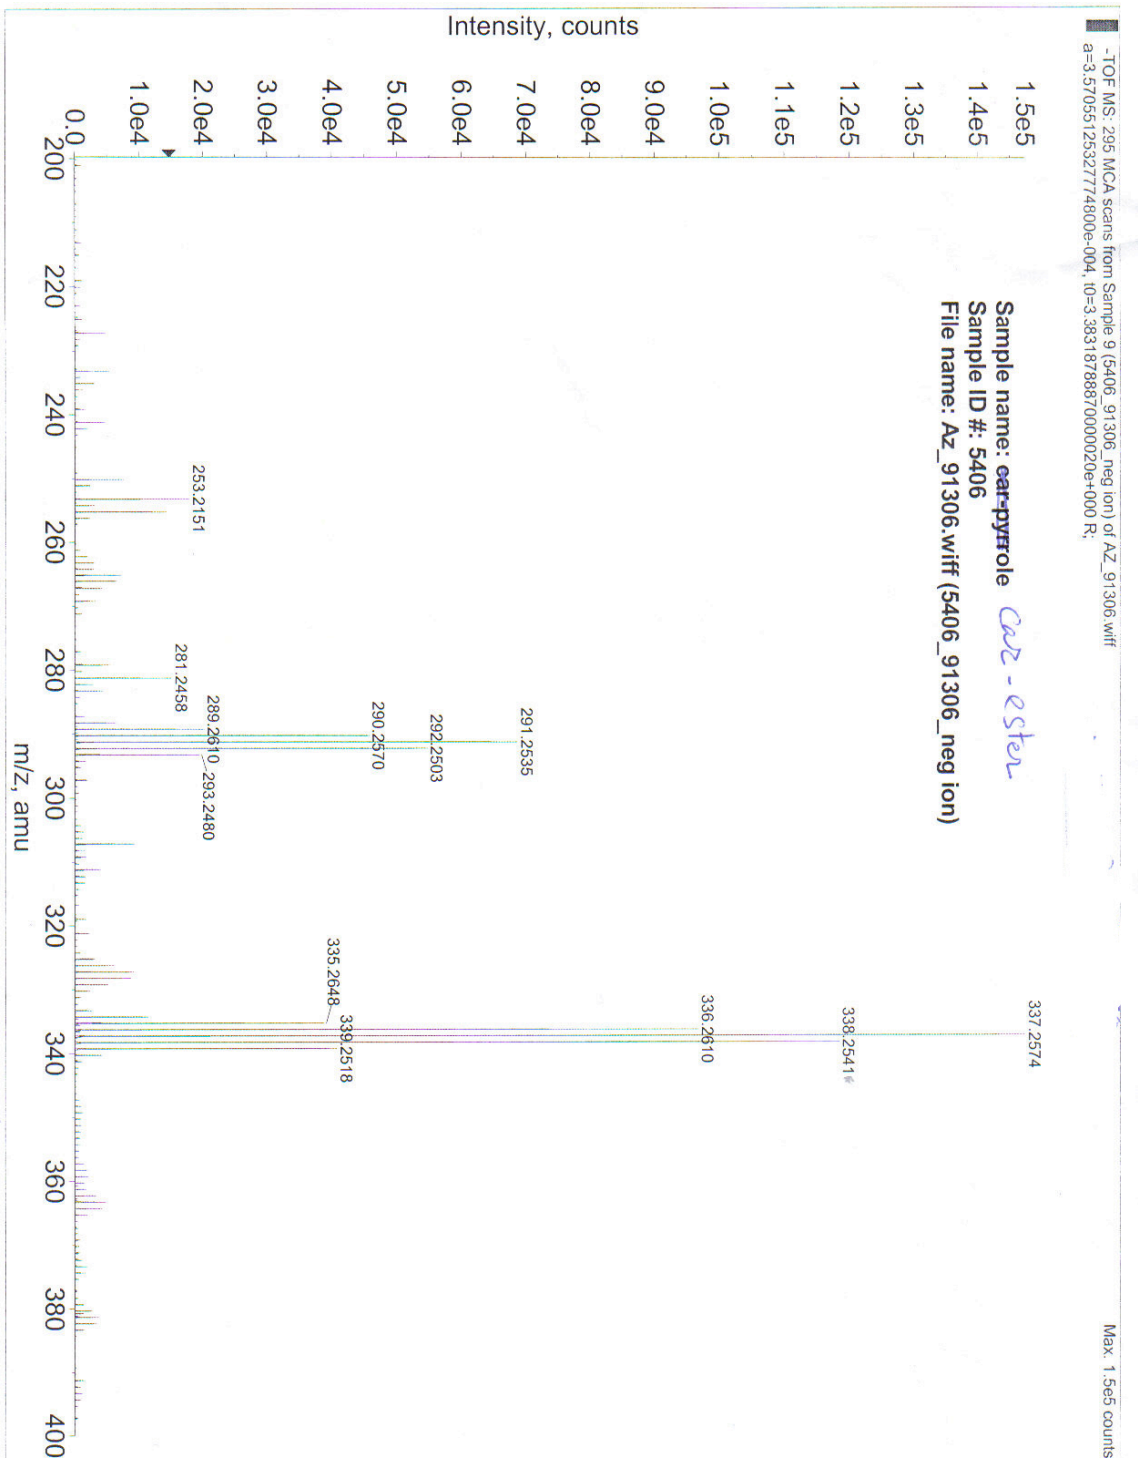

Figure 1: HRMS (ESI) for compound 2.

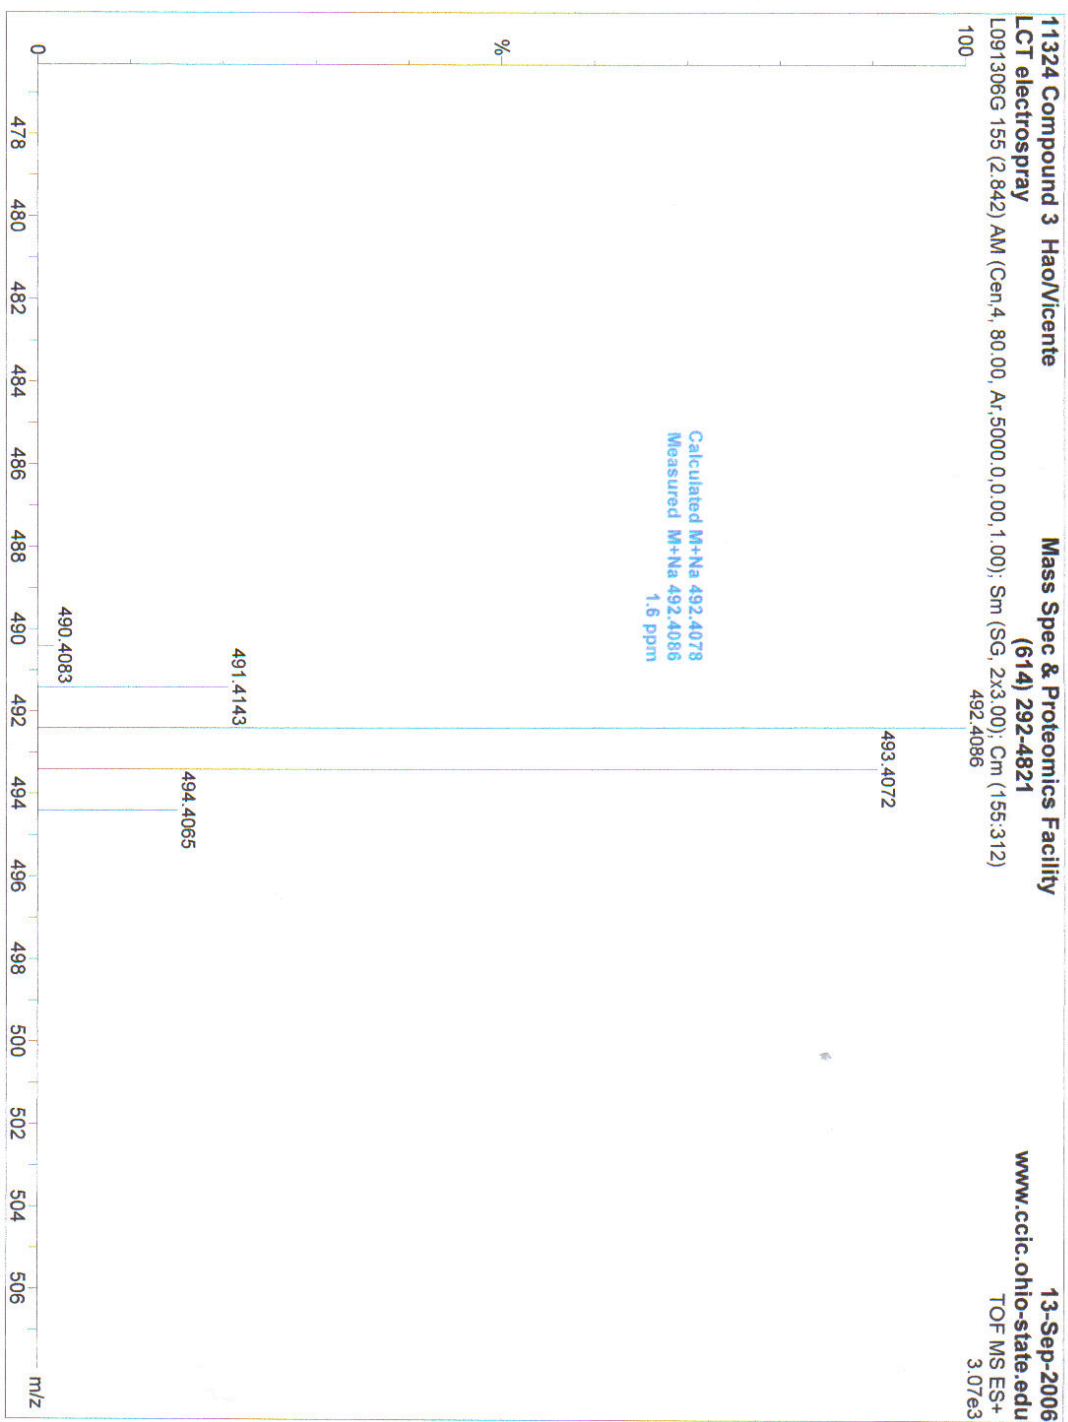

Figure 2: HRMS (ESI) for compound 3.

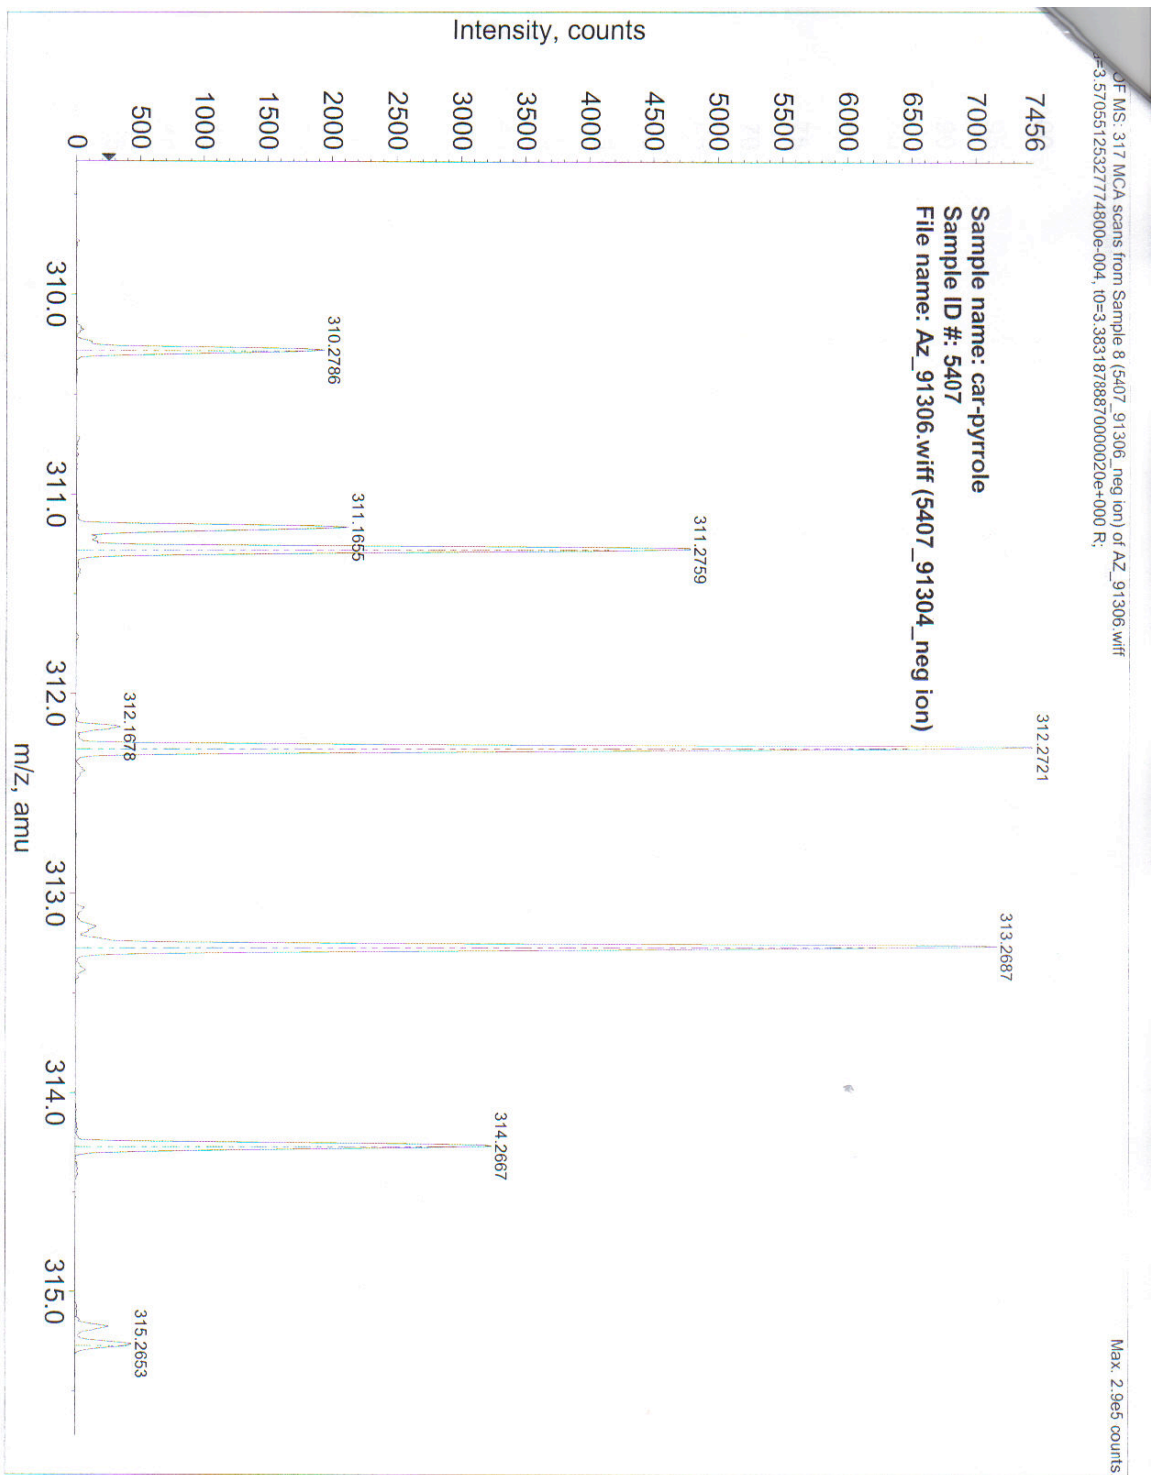

Figure 3: HRMS (ESI) for compound 4.

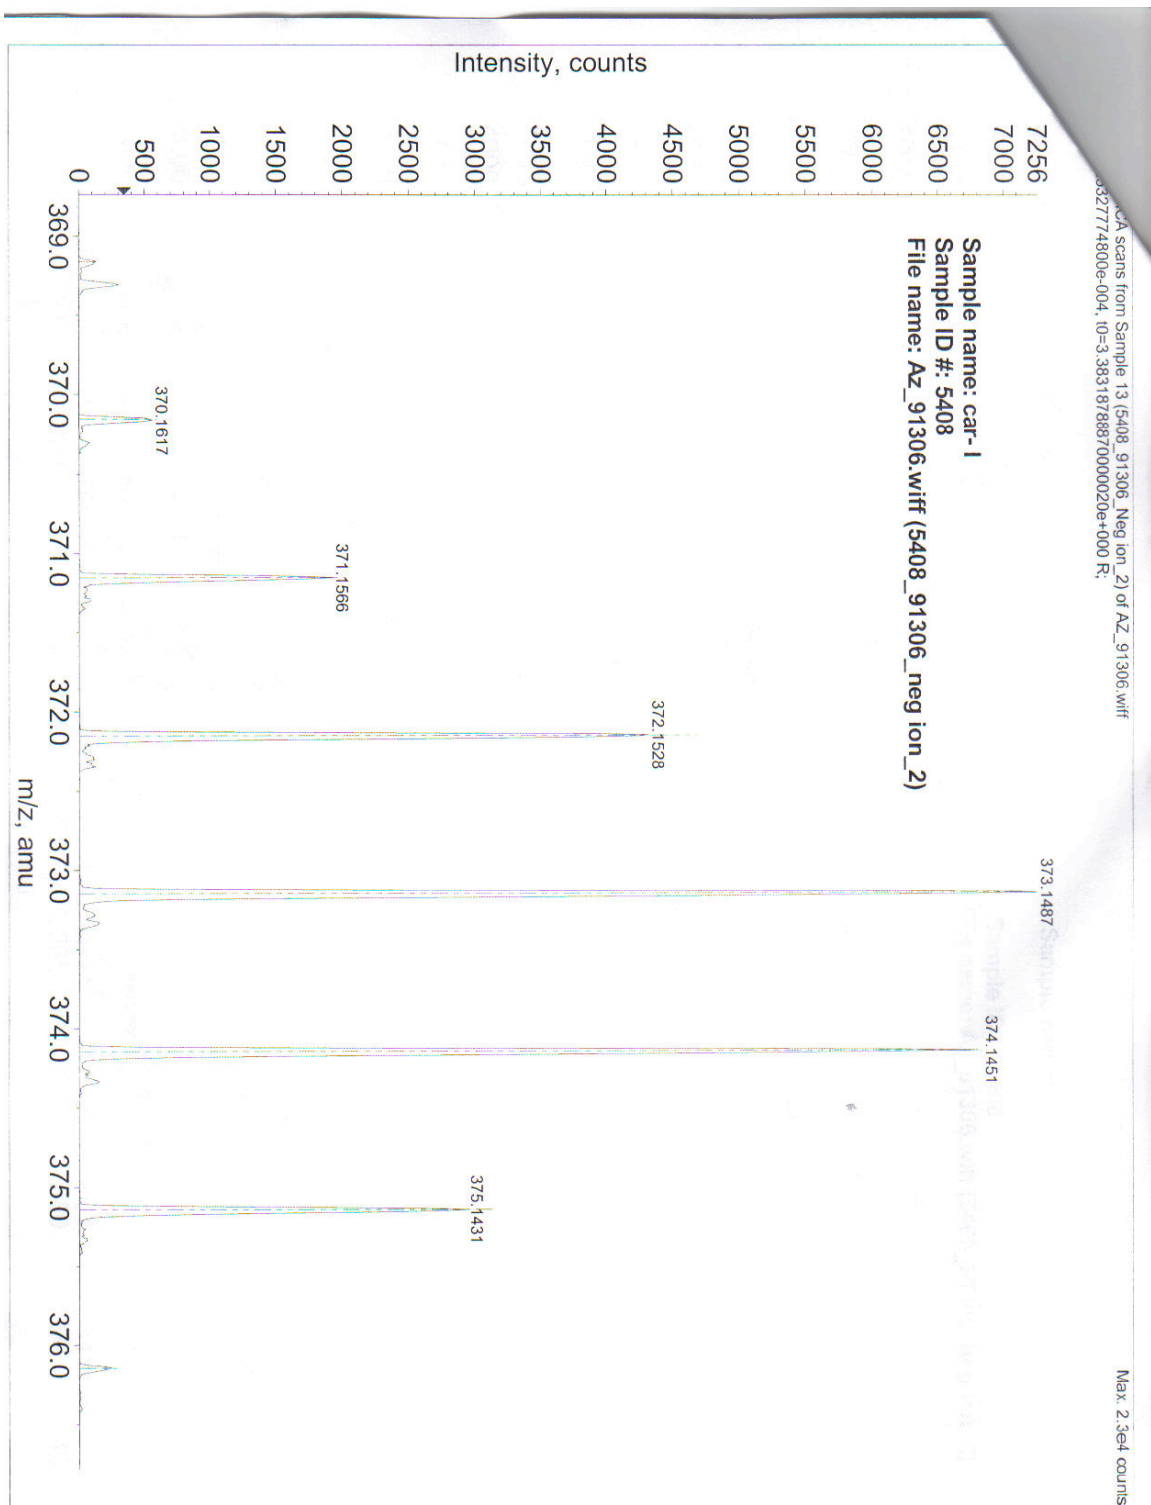

Figure 4: HRMS (ESI) for compound 6.

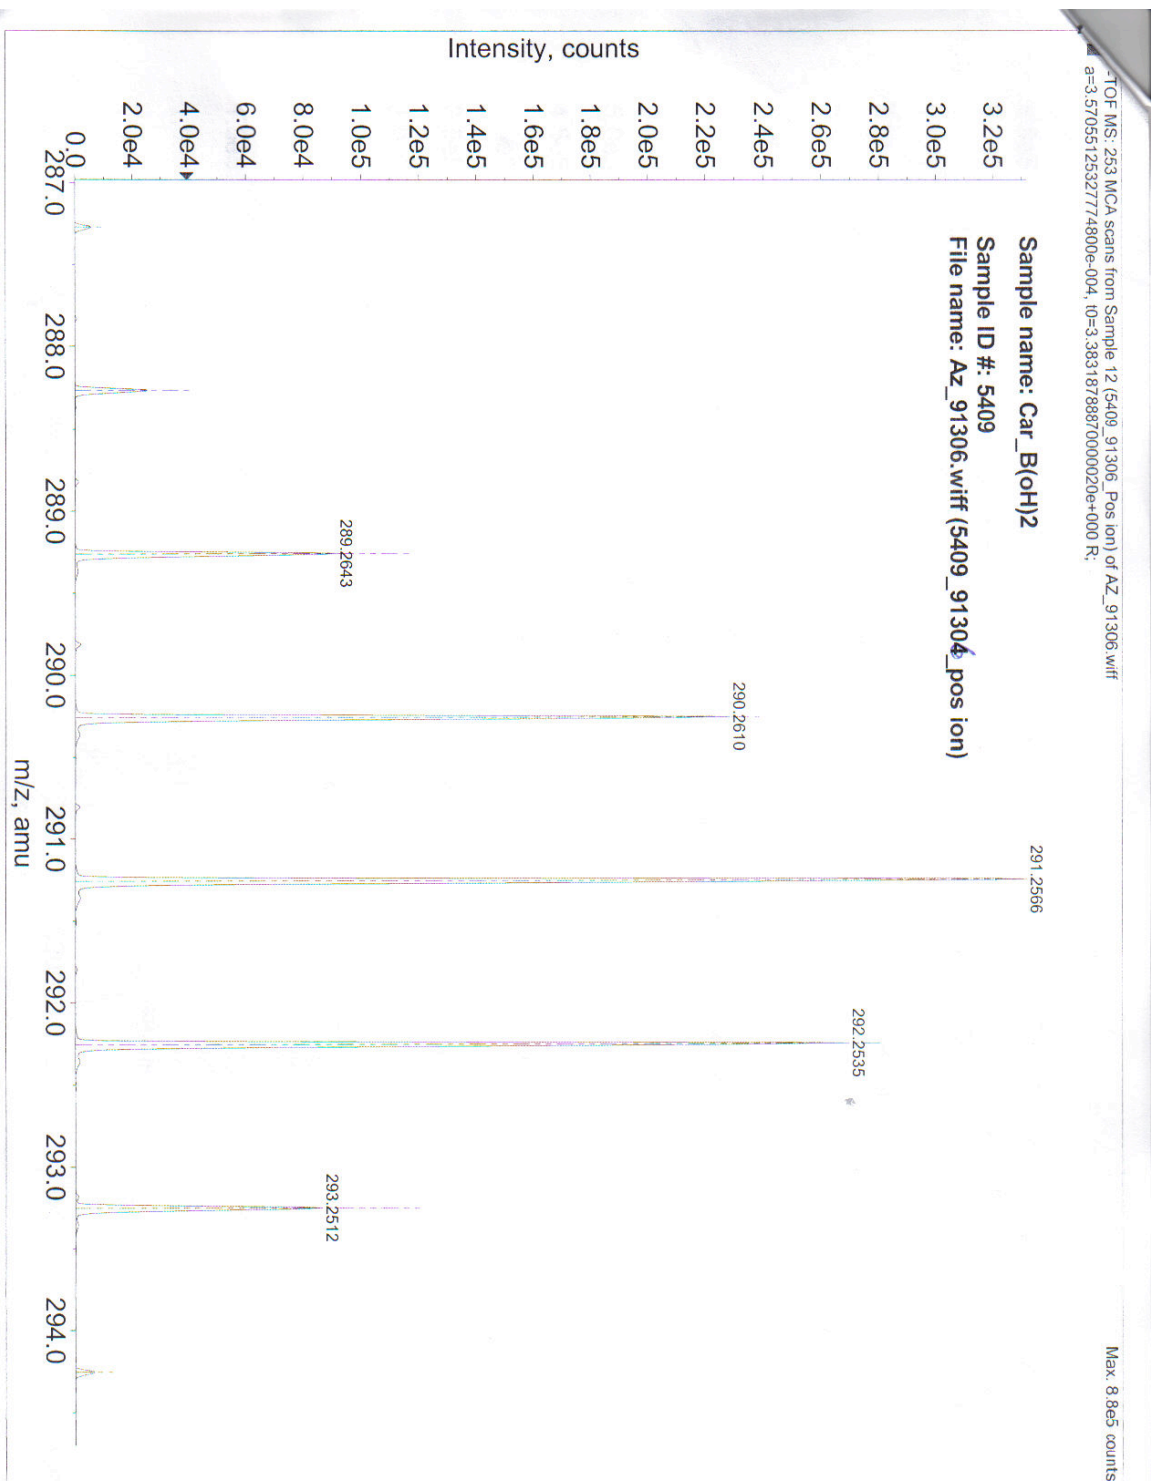

Figure 5: HRMS (ESI) for compound **8**.



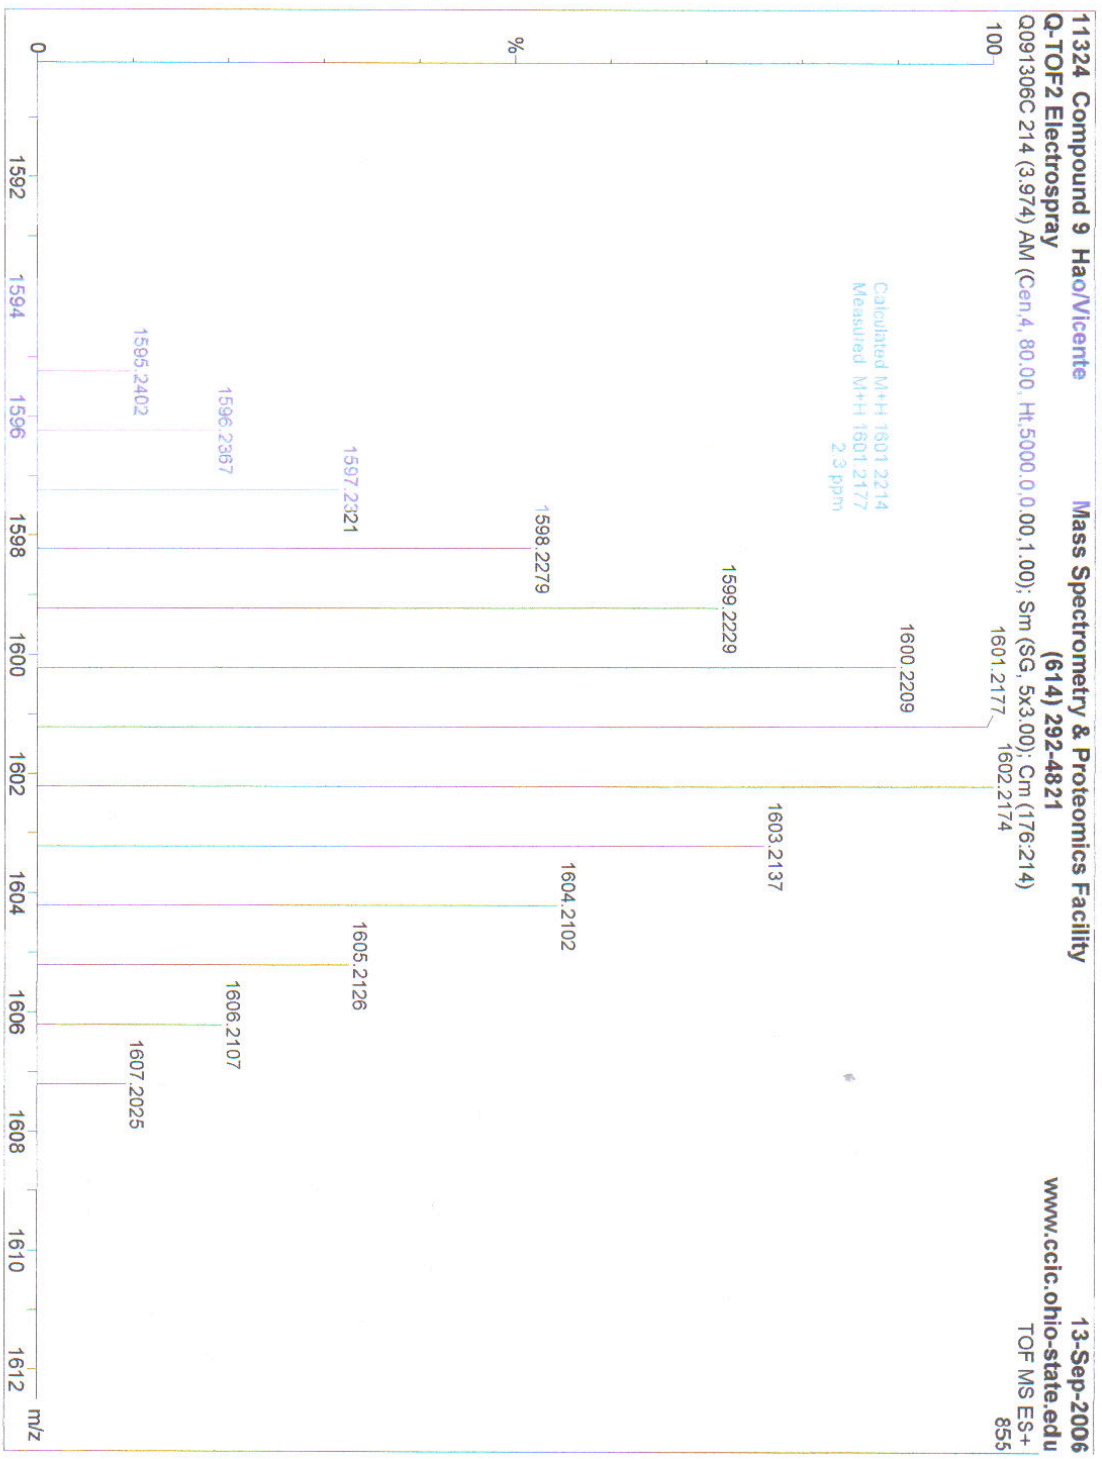

Figure 6: HRMS (ESI) for compound 9.

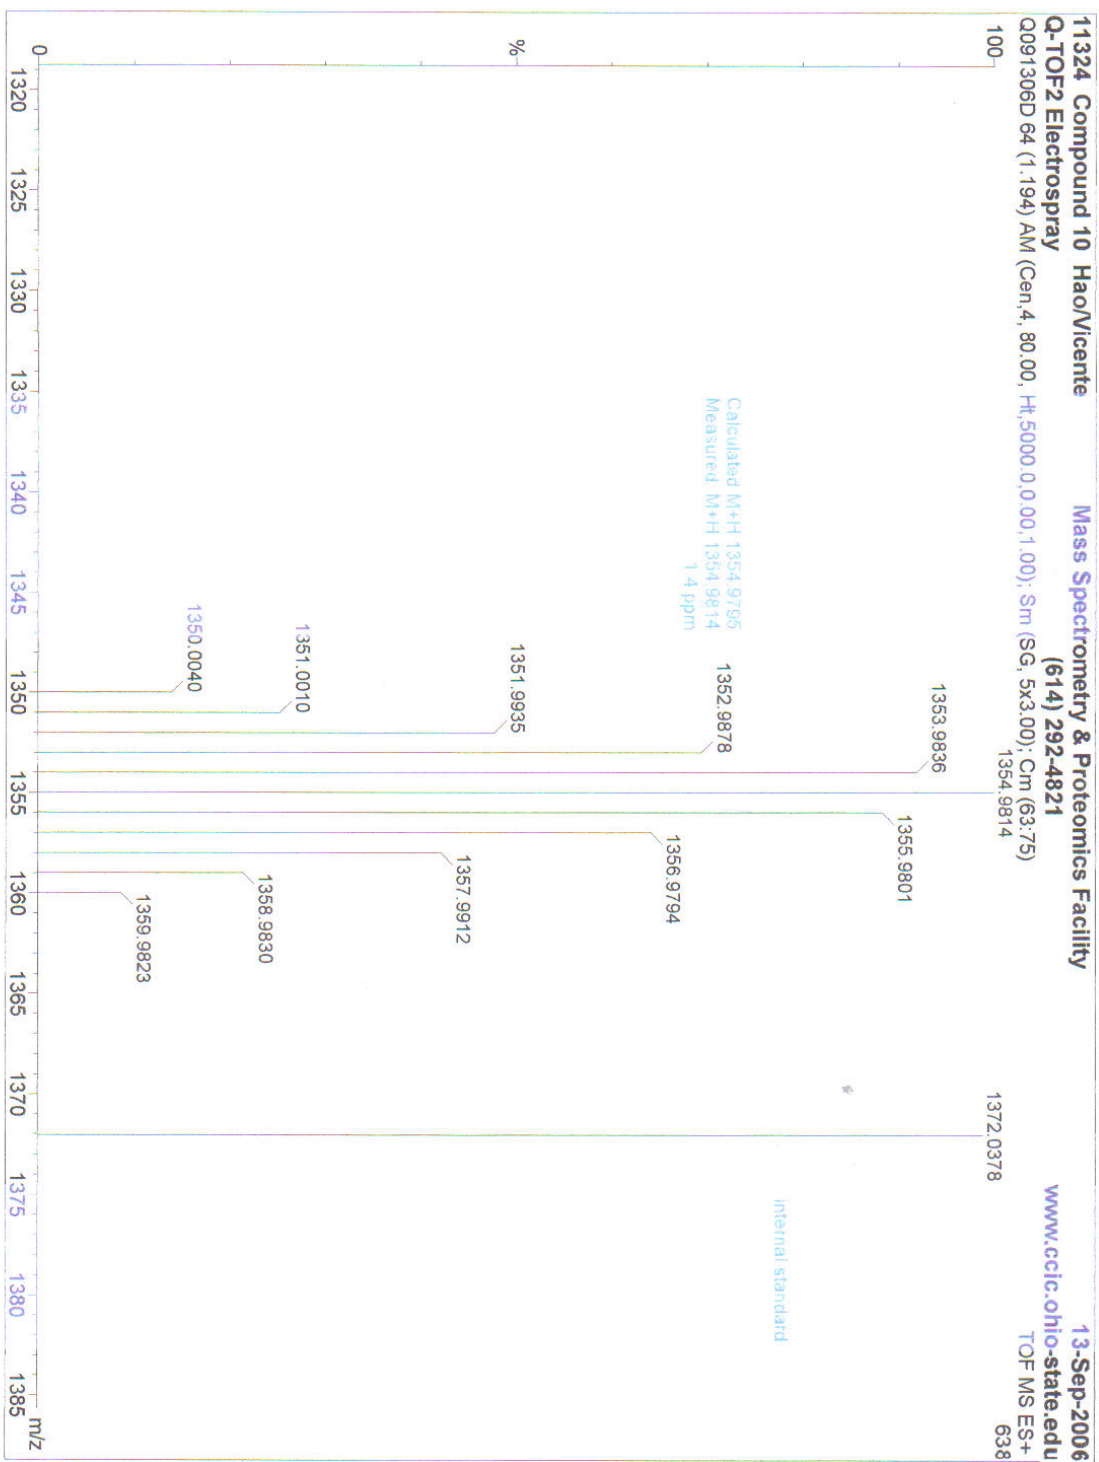

Figure 7: HRMS (ESI) for compound 10.

# INITIAL PCB

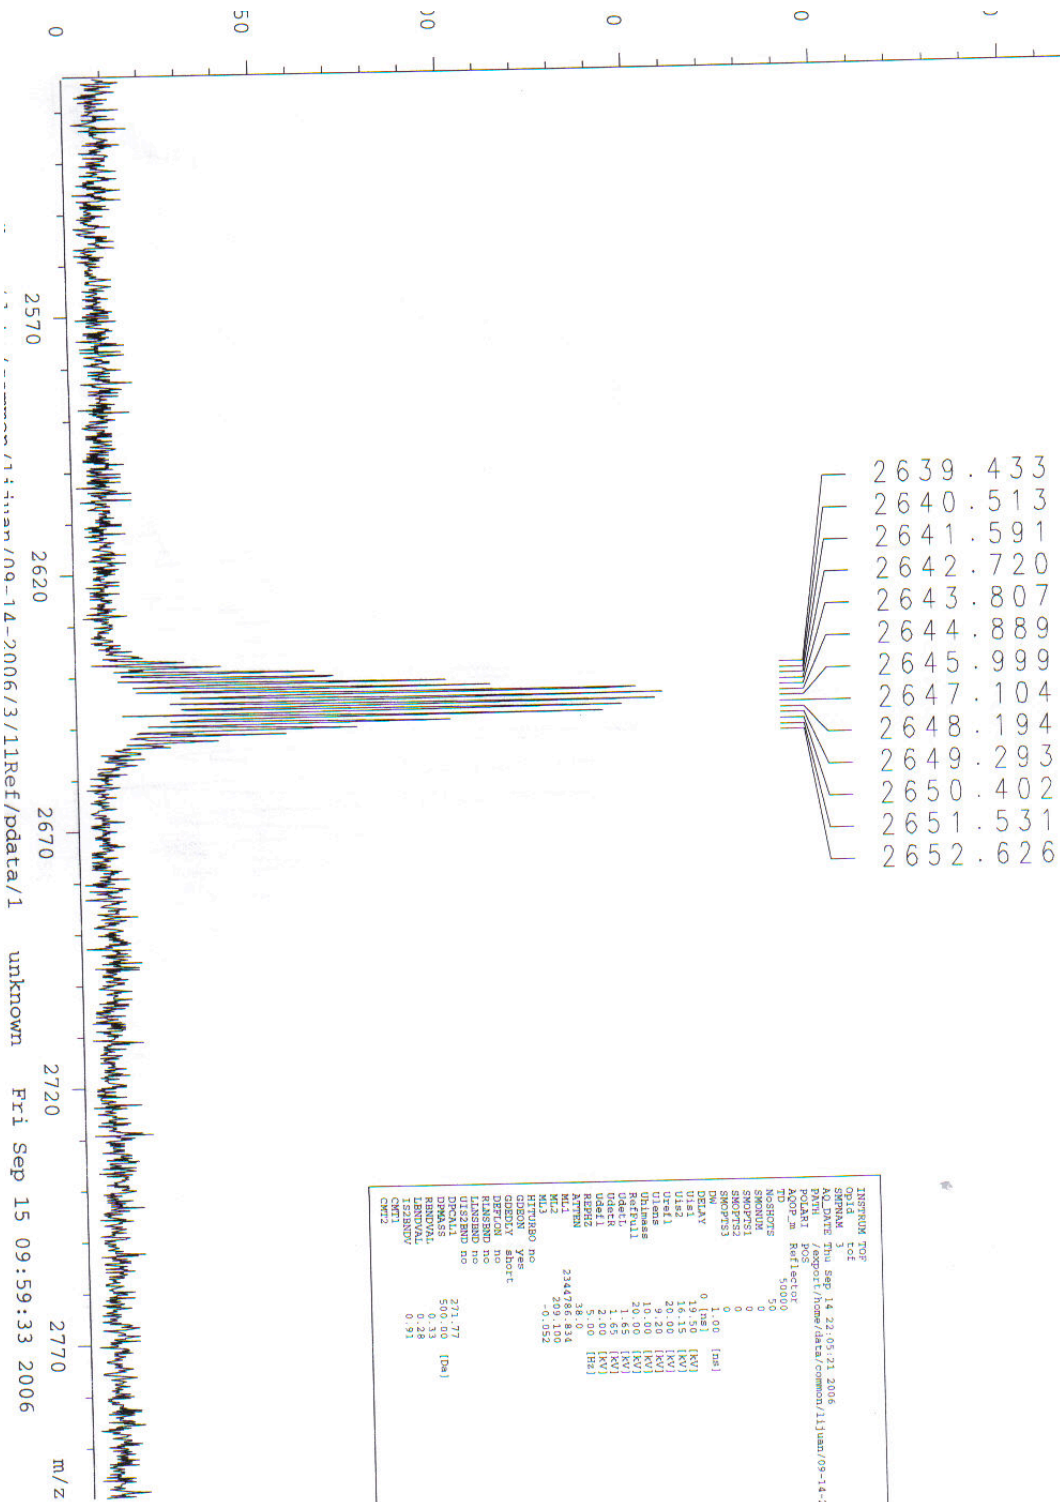

Figure 6: MALDI-TOF for compound 11.
